# Supplementary material for: Metastable intermolecular composites of Al and CuO nanoparticles assembled with graphene quantum dots
Source: Royal Society of Chemistry journal article supplement (doi:10.1039/c6ra25972c), 2017-01-01
Supplement: c6ra25972c1.pdf [file c6ra25972c1.pdf]

## Supplementary Information

### Metastable Intermolecular Composites of Al and CuO Nanoparticles Assembled with Graphene Quantum Dots

*Yue Tao,<sup>a</sup> Jiali Zhang,<sup>b</sup> Yaoyao Yang,<sup>b</sup> Haixia Wu,<sup>b</sup> Lan Hu,<sup>c</sup> Xiaohu Dong,<sup>c</sup> Jian Lu,<sup>c</sup>  
and Shouwu Guo<sup>b\*</sup>*

<sup>a</sup> Department of Polymer Science and Engineering, School of Chemistry and  
Chemical Engineering, Shanghai Jiao Tong University, Shanghai 200240, P.R. China

<sup>b</sup> Department of Electronic Engineering, School of Electronic Information and  
Electrical Engineering, Shanghai Jiao Tong University, Shanghai 200240, P.R. China

<sup>c</sup> Xian Modern Chemistry Institute, Xian, Shaanxi 710065, P.R. China

Corresponding Author: Shouwu Guo, Tel/Fax: 0086-21-34206915, E-mail:

[swguo@sjtu.edu.cn](mailto:swguo@sjtu.edu.cn)

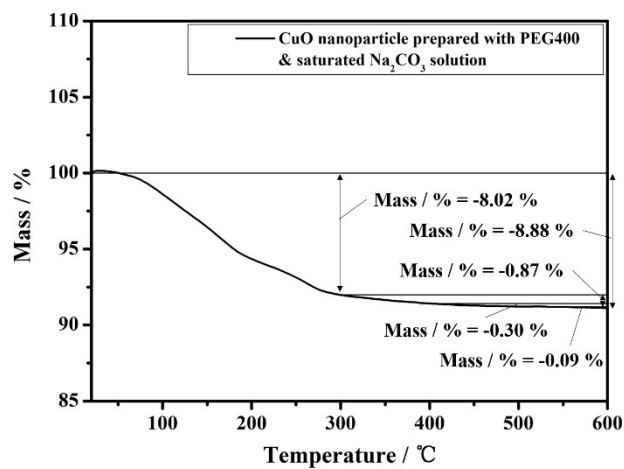

Figure S1. Thermogravimetric Analysis of the as-prepared CuO NPs.

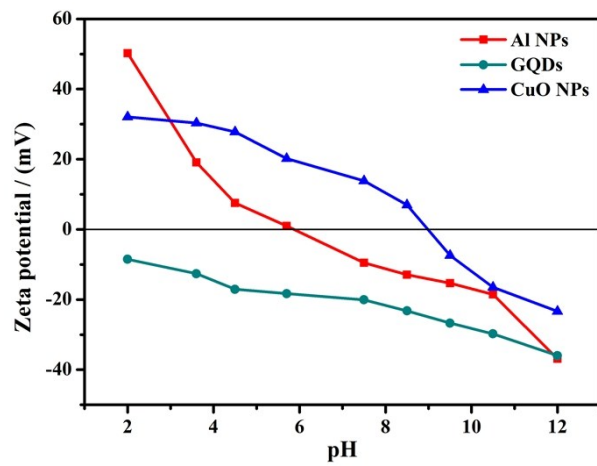

**Figure S2.** Zeta potential of Al NPs, GQDs and CuO NPs at different pH values.

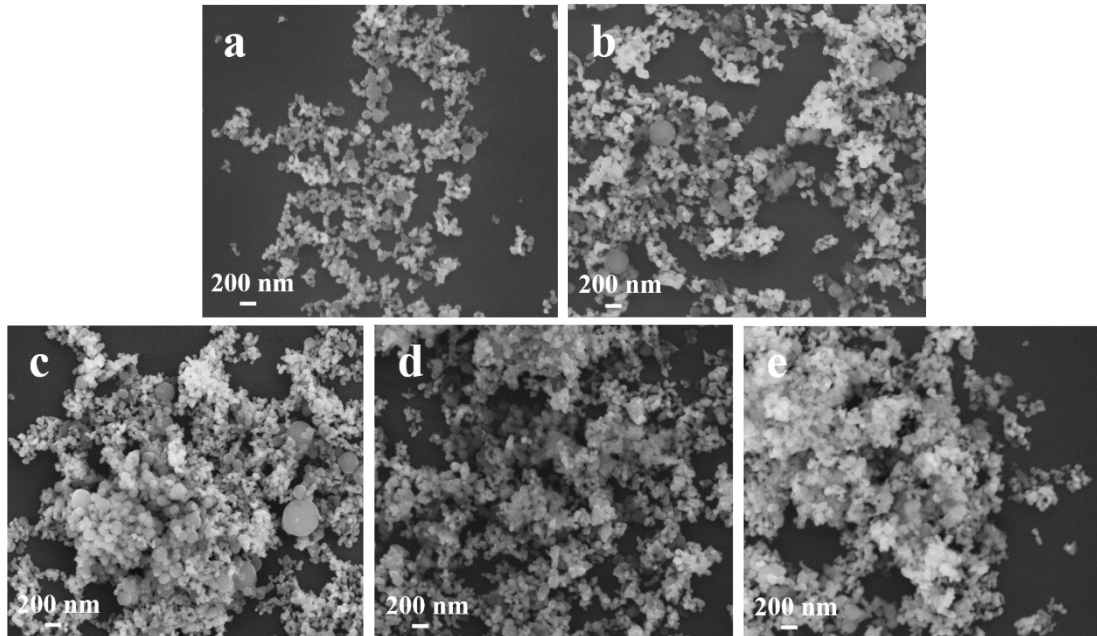

**Figure S3.** SEM images of the Al/GQDs/CuO MICs assembled at 30 °C with Al:GQDs:CuO ratios of 20:0:90 (a), 20:0.5:90 (b), 20:2:90 (c), 20:5:90 (d), 20:10:90 (e).

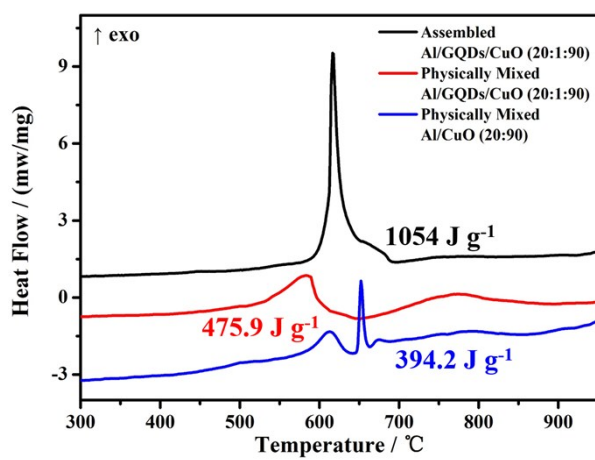

**Figure S4.** DSC curves of assembled Al/GQDs/CuO MICs, physically mixed Al/GQDs/CuO and physically mixed Al/CuO.

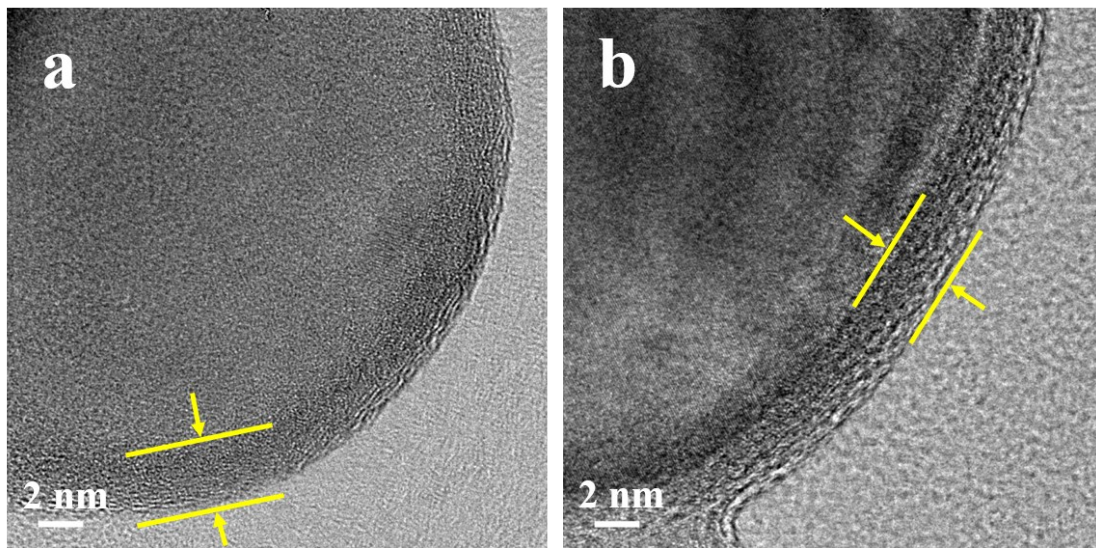

**Figure S5.** TEM image of Al NPs before (a) and after (panel b) the acid whittling partially of the native oxide layer.

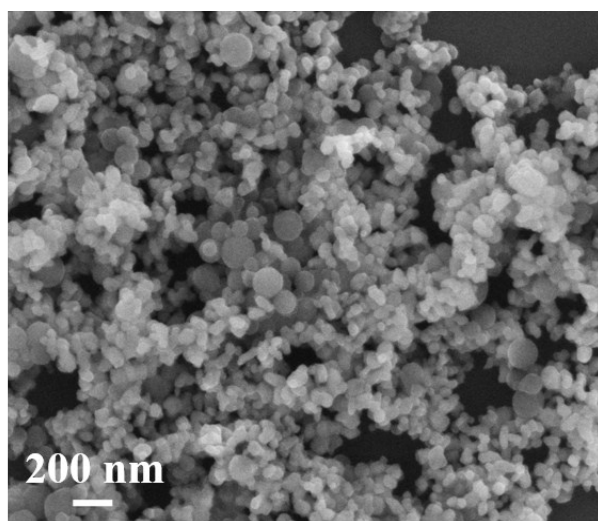

**Figure S6.** SEM image of the Al/GQDs/CuO MICs with Al:GQDs:CuO ratio of is 20:1:90 after acid whittling.
